# Supplementary material for: Does genetic structure reflect differences in non-breeding movements? A case study in small, highly mobile seabirds
Source: PubMed Central journal article supplement (PMC5499058; doi:10.1186/s12862-017-1008-x), 2017-07-05

## **Additional file 1**

Authors:

Petra Quillfeldt, Yohan Moodley, Henri Weimerskirch, Yves Cherel, Karine Delord, Richard Phillips, Joan Navarro, Luciano Calderón, & Juan F. Masello

**Title:**

**Does the genetic structure reflect differences in non-breeding movement? A case study in small, highly mobile seabirds**

Figure S1. Distribution of Atlantic and Indian Ocean populations of blue petrels *Halobaena caerulea* and thin-billed prions *Pachyptila belcheri* during the period of highest overlap in the winter.

Figure S2. Cytochrome *b* gene tree for the two major populations in the Atlantic and Indian oceans Oceans of the blue petrel *Halobaena caerulea*.

Figure S3. Cytochrome *b* gene tree for the two major populations in the Atlantic and Indian oceans Oceans of the thin-billed prion *Pachyptila belcheri*.

Figure S4. Cytochrome *b* gene tree for the two major populations in the Atlantic and Indian oceans Oceans of the Antarctic prion *Pachyptila desolata*.

Figure S1. Distribution of Atlantic and Indian Ocean populations of Blue petrels *Halobaena caerulea* and Thin-billed prions *Pachyptila belcheri* during the highest overlap in winter distribution, based on monthly 95% kernel distributions, obtained by geolocator tracking in the austral winters 2010-2013 (for details, see [2,17,18,27]). Black triangles mark the breeding colonies of Atlantic Ocean populations, and red triangles mark the Kerguelen archipelago, the site of the breeding colonies in the Indian Ocean.

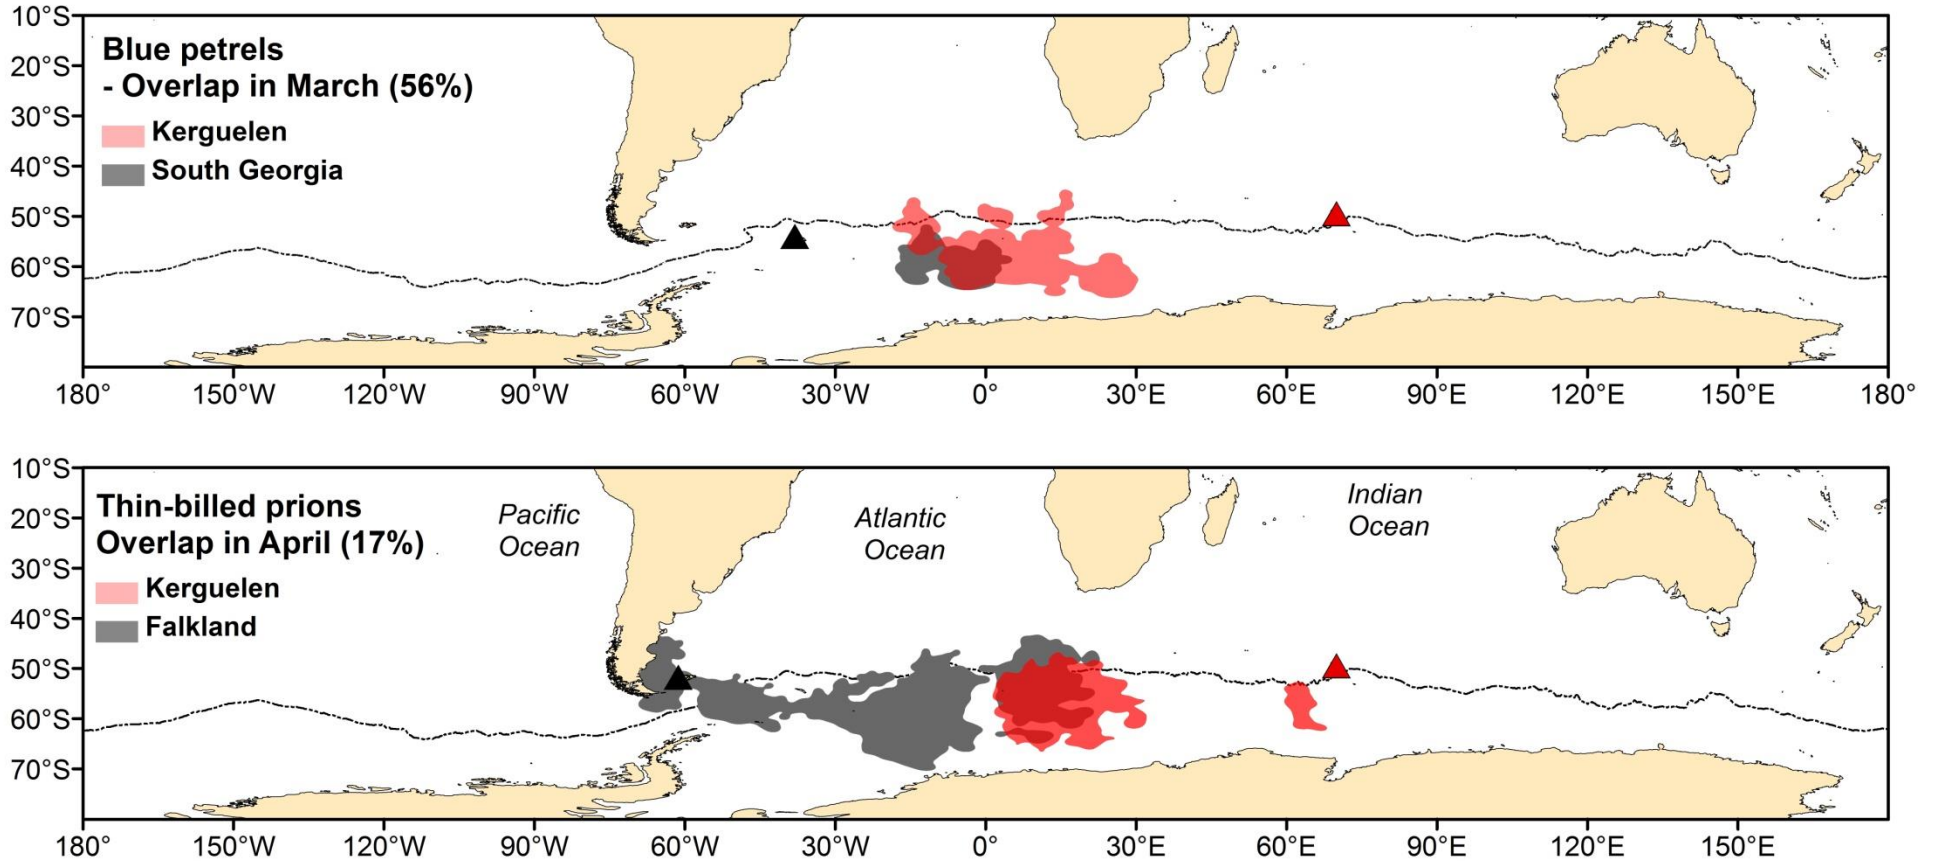

Figure S2 Cytochrome *b* gene tree for the two major populations in the Atlantic and Indian oceans of the Blue petrel *Halobaena caerulea*, inferred by using the maximum likelihood method based on the Hasegawa-Kishino-Yano model and applying the Neighbor-Joining method for the heuristic search. The name used for the individual samples codes the individual name (two or three digit number), the species (here “c” for *caerulea*) and the colony of origin (MY: Île Mayès, Kerguelen, Indian Ocean, in red in the bar to the right; BI: Bird I., South Georgia; Atlantic Ocean, in black in the bar). A Fairy prion *Pachyptila turtur* sample from Beauchêne I., Falkland / Malvinas Is. (289tBE; 52°55’S, 59°11’W) was used as out-group.

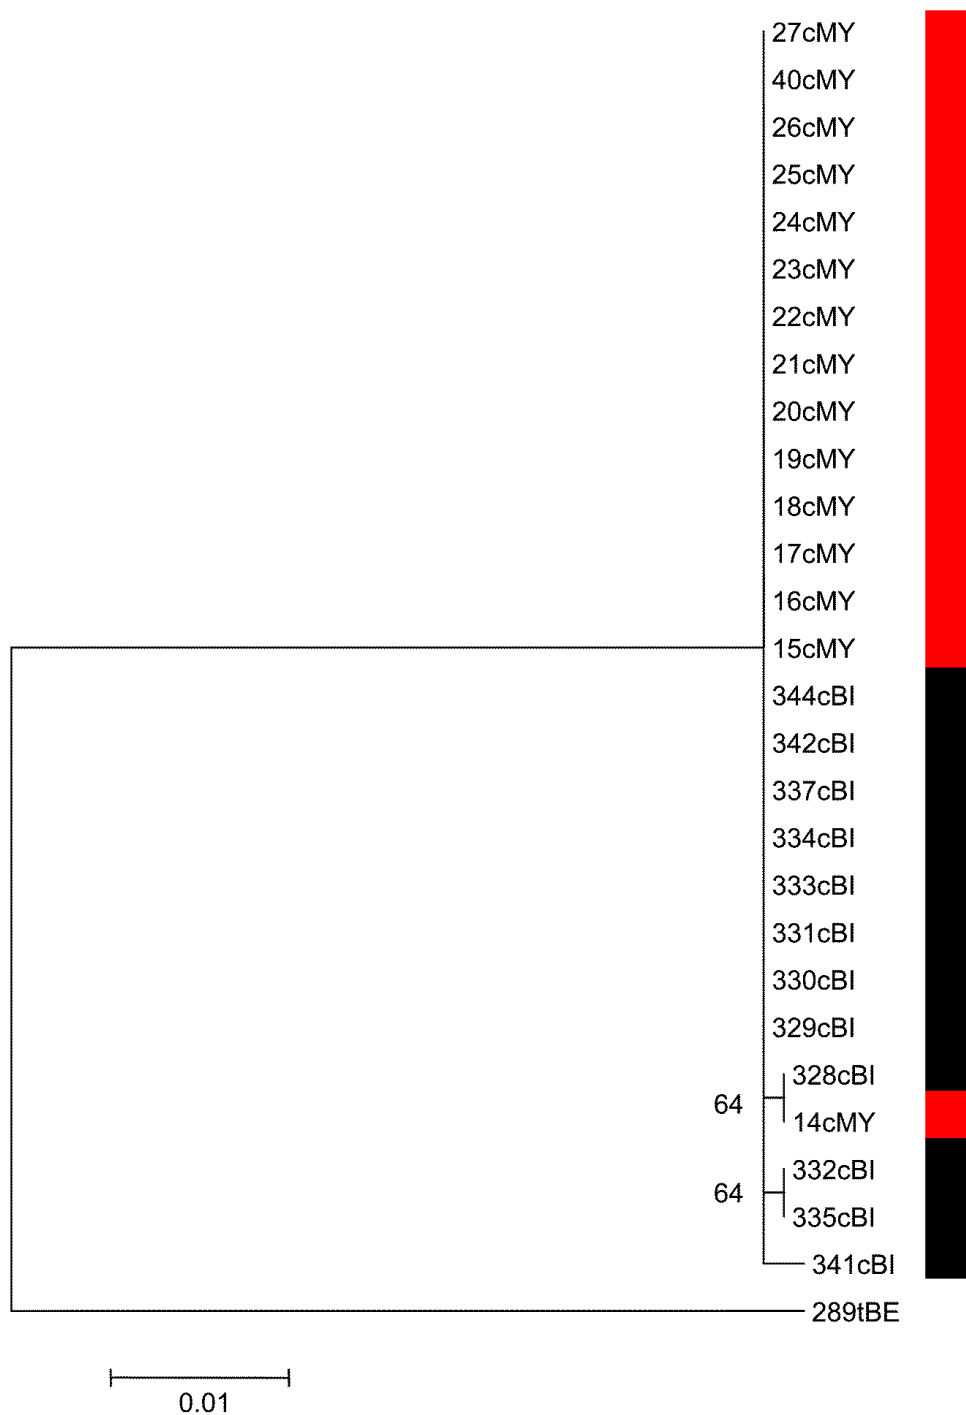

Figure S3. Cytochrome *b* gene tree for the two major populations in the Atlantic and Indian oceans of the Thin-billed prion *Pachyptila belcheri*, inferred by using the maximum likelihood method based on the Hasegawa-Kishino-Yano model and applying the Neighbor-Joining method for the heuristic search. The name used for the individual samples codes the individual name (two or three digit number), the species (here “b” for *belcheri*) and the colony of origin (MY: Île Mayès, Kerguelen, Indian Ocean, in red in the bar to the right; NI: New Island, Falkland/Malvinas Islands, Atlantic Ocean, in black in the bar). A Fairy prion *Pachyptila turtur* sample from Beauchêne I., Falkland / Malvinas Is. (289tBE; 52°55'S, 59°11'W) was used as out-group.

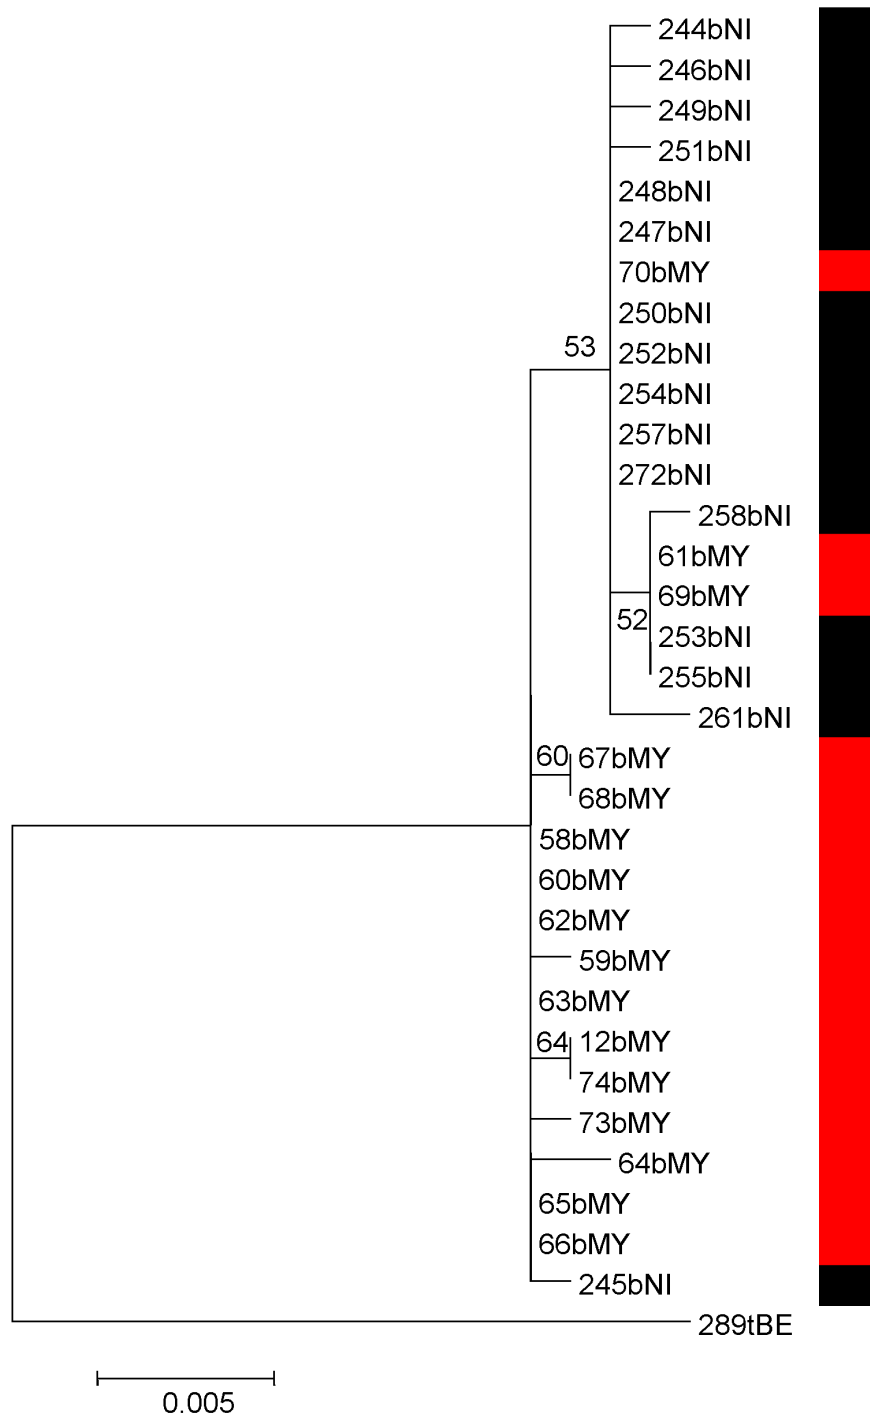

Figure S4. Cytochrome *b* gene tree for the two major populations in the Atlantic and Indian oceans of the Antarctic prion *Pachyptila desolata*, inferred by using the maximum likelihood method based on the Hasegawa-Kishino-Yano model and applying the Neighbor-Joining method for the heuristic search. The name used for the individual samples codes the individual name (two or three digit number), the species (here “d” for *desolata*) and the colony of origin (VE: Île Verte, Kerguelen, Indian Ocean, in red in the bar to the right; BI: Bird I., South Georgia, Atlantic Ocean, in black in the bar). A Fairy prion *Pachyptila turtur* sample from Beauchêne I., Falkland / Malvinas Is. (289tBE; 52°55’S, 59°11’W) was used as out-group.

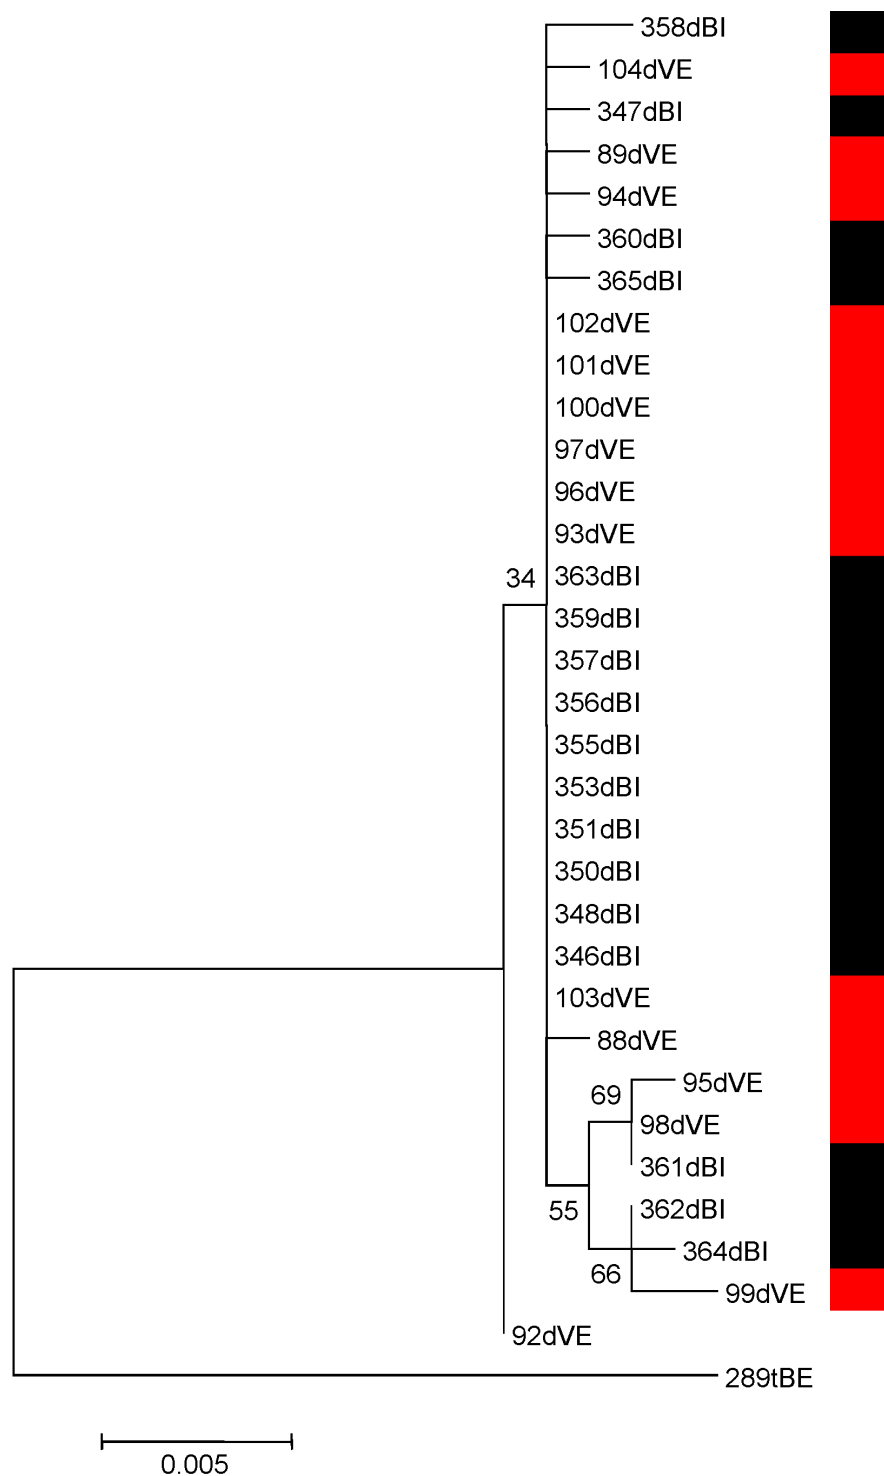

Supplement: 12862_2017_1008_MOESM1_ESM.pdf [file 12862_2017_1008_MOESM1_ESM.pdf]
